# Supplementary material for: Immune landscape, evolution, hypoxia-mediated viral mimicry pathways and therapeutic potential in molecular subtypes of pancreatic neuroendocrine tumours
Source: PubMed Central journal article supplement — Gut. 2020 Sep 3;70(10):1904–13. doi: 10.1136/gutjnl-2020-321016 (PMC8458094; doi:10.1136/gutjnl-2020-321016), 2020-09-03

## Supplementary Figure 5

A. Combined PanNET and melanoma datasets to show *PDL1* expression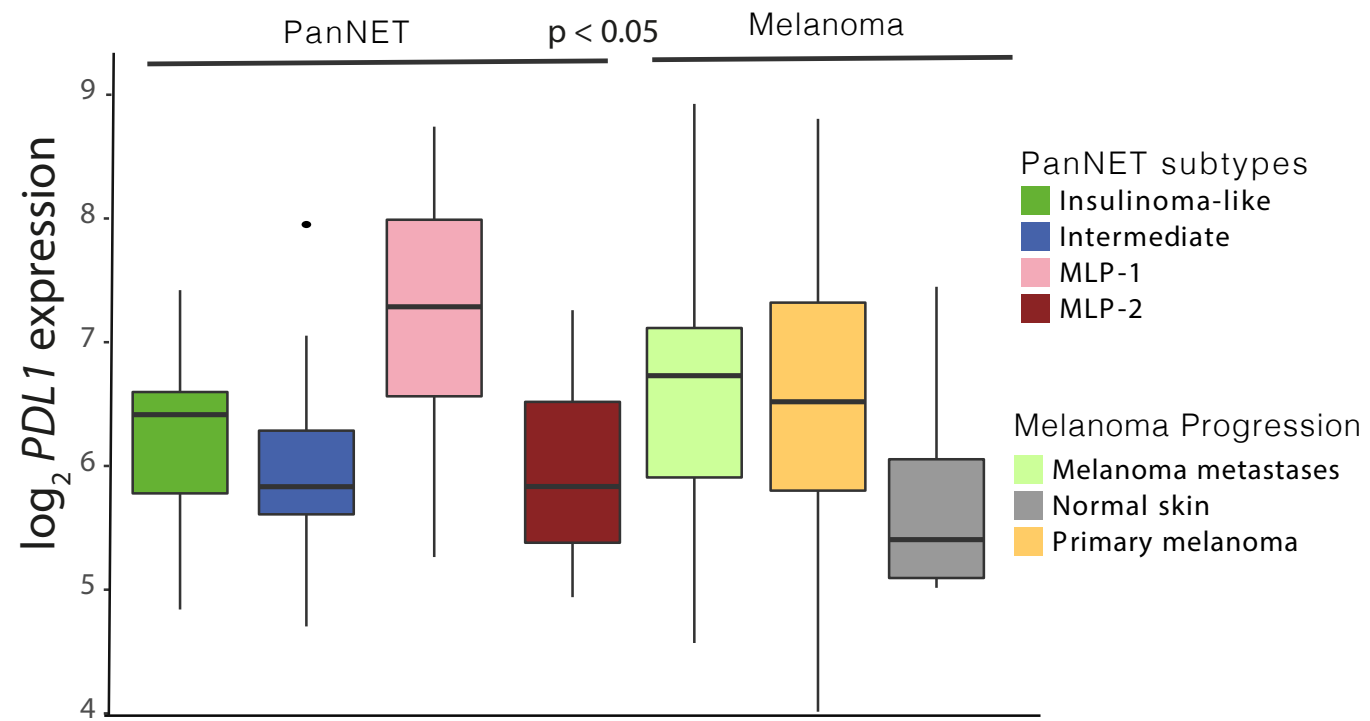B. Combined PanNET and melanoma datasets to show *PDL2* expression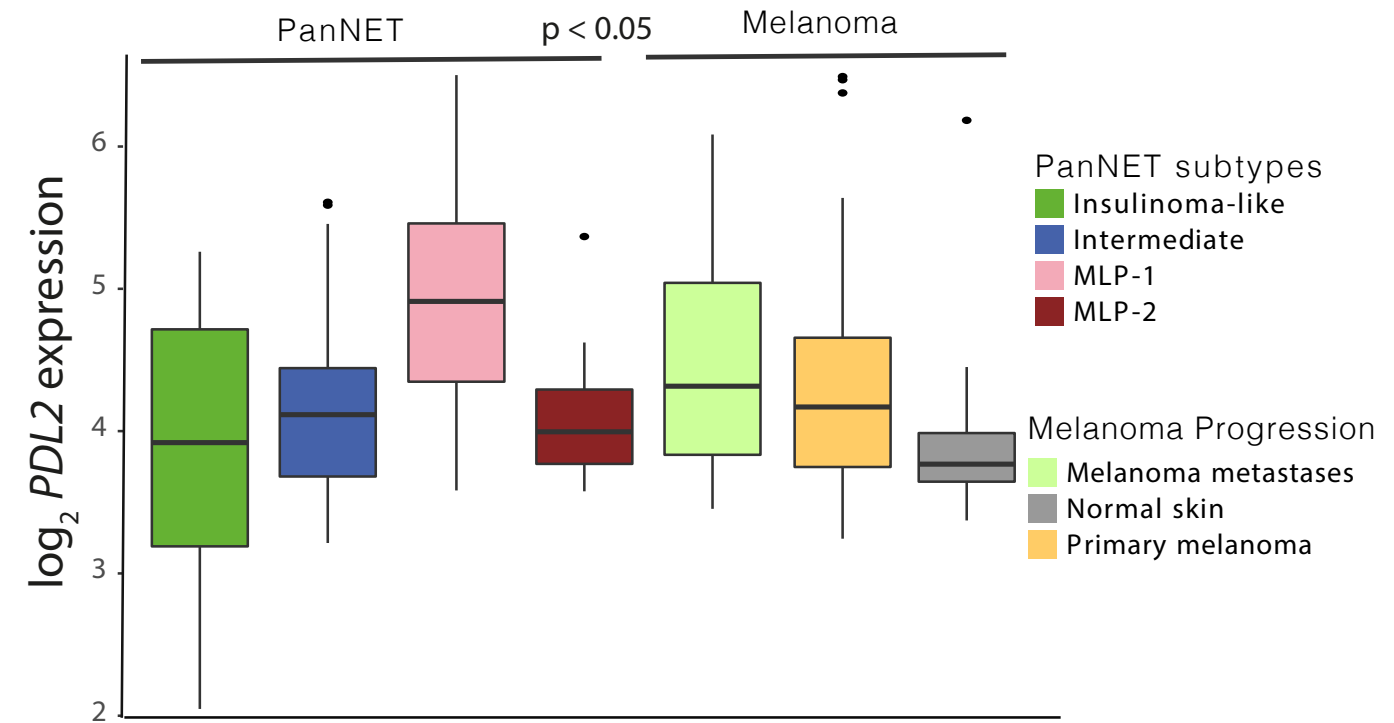

C. Combined PanNET and melanoma datasets to show T cell GEP scores

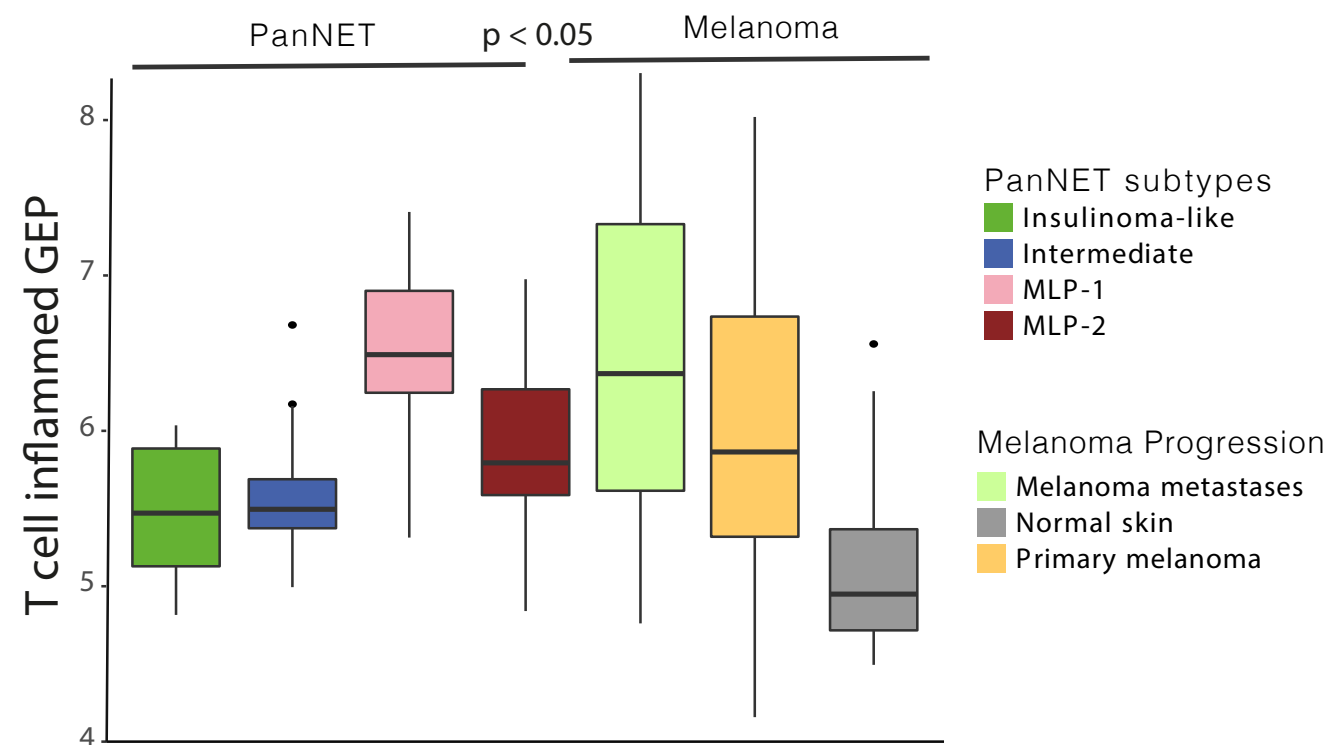D. *FOXP3* expression in PanNET subtypes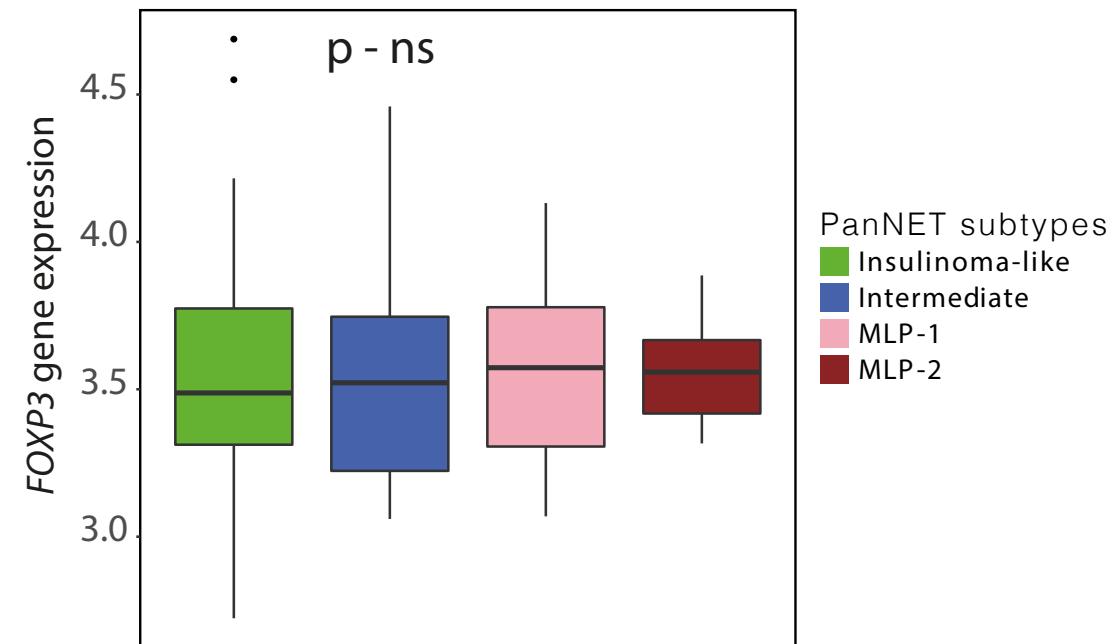

Supplement: gutjnl-2020-321016supp007.pdf [file gutjnl-2020-321016supp007.pdf]
