# Supplementary figures and images for: Immune landscape, evolution, hypoxia-mediated viral mimicry pathways and therapeutic potential in molecular subtypes of pancreatic neuroendocrine tumours
Source: PubMed Central journal article supplement — Gut. 2020 Sep 3;70(10):1904–13. doi: 10.1136/gutjnl-2020-321016 (PMC8458094; doi:10.1136/gutjnl-2020-321016), 2020-09-03

Supplementary Figure 2

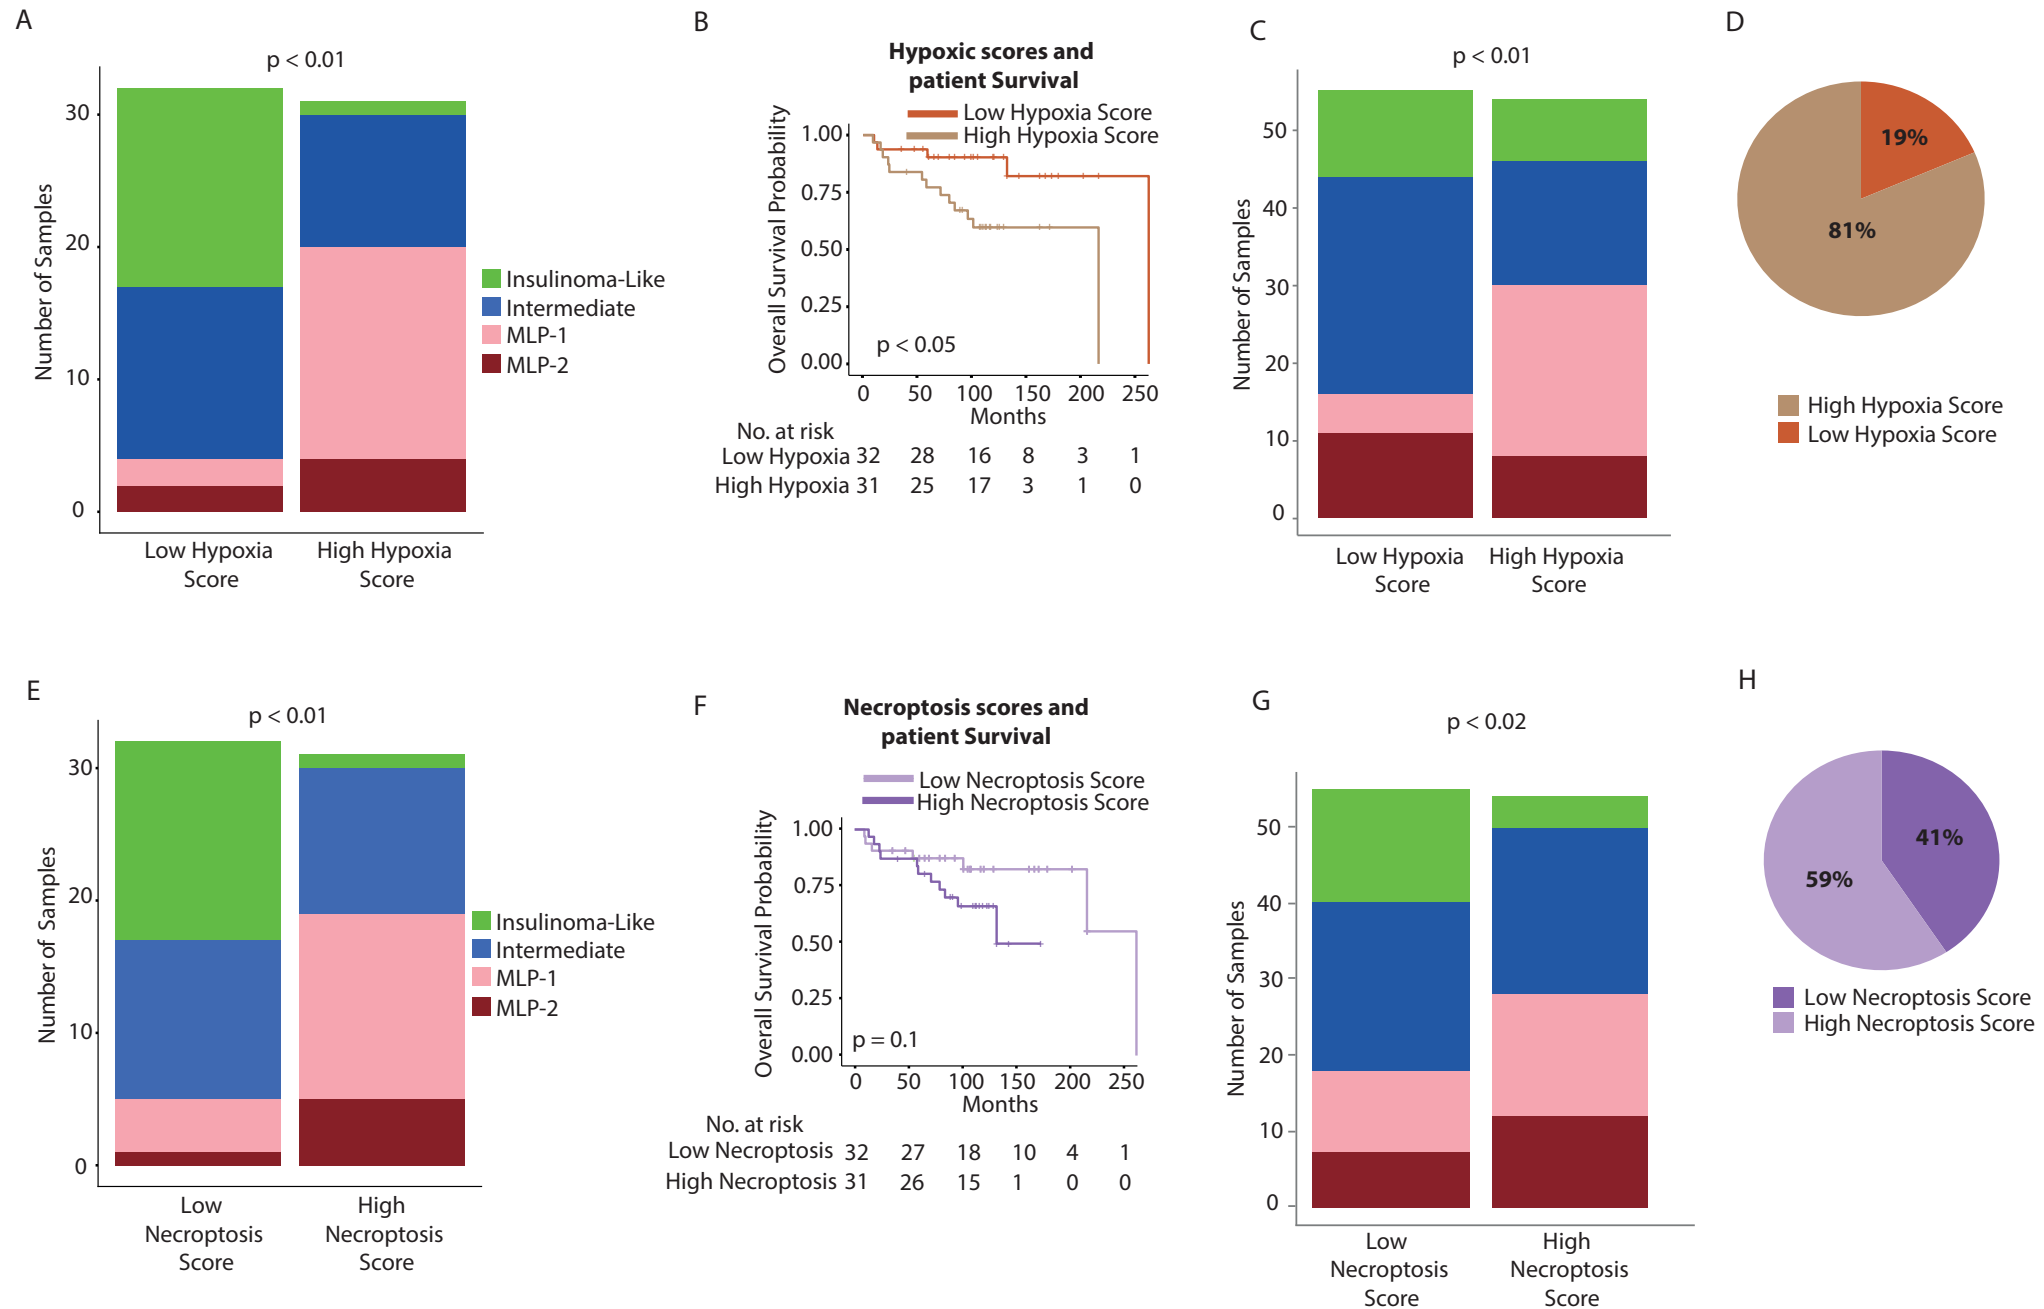

Supplement: gutjnl-2020-321016supp004.pdf [file gutjnl-2020-321016supp004.pdf]

## Supplementary Figure 3

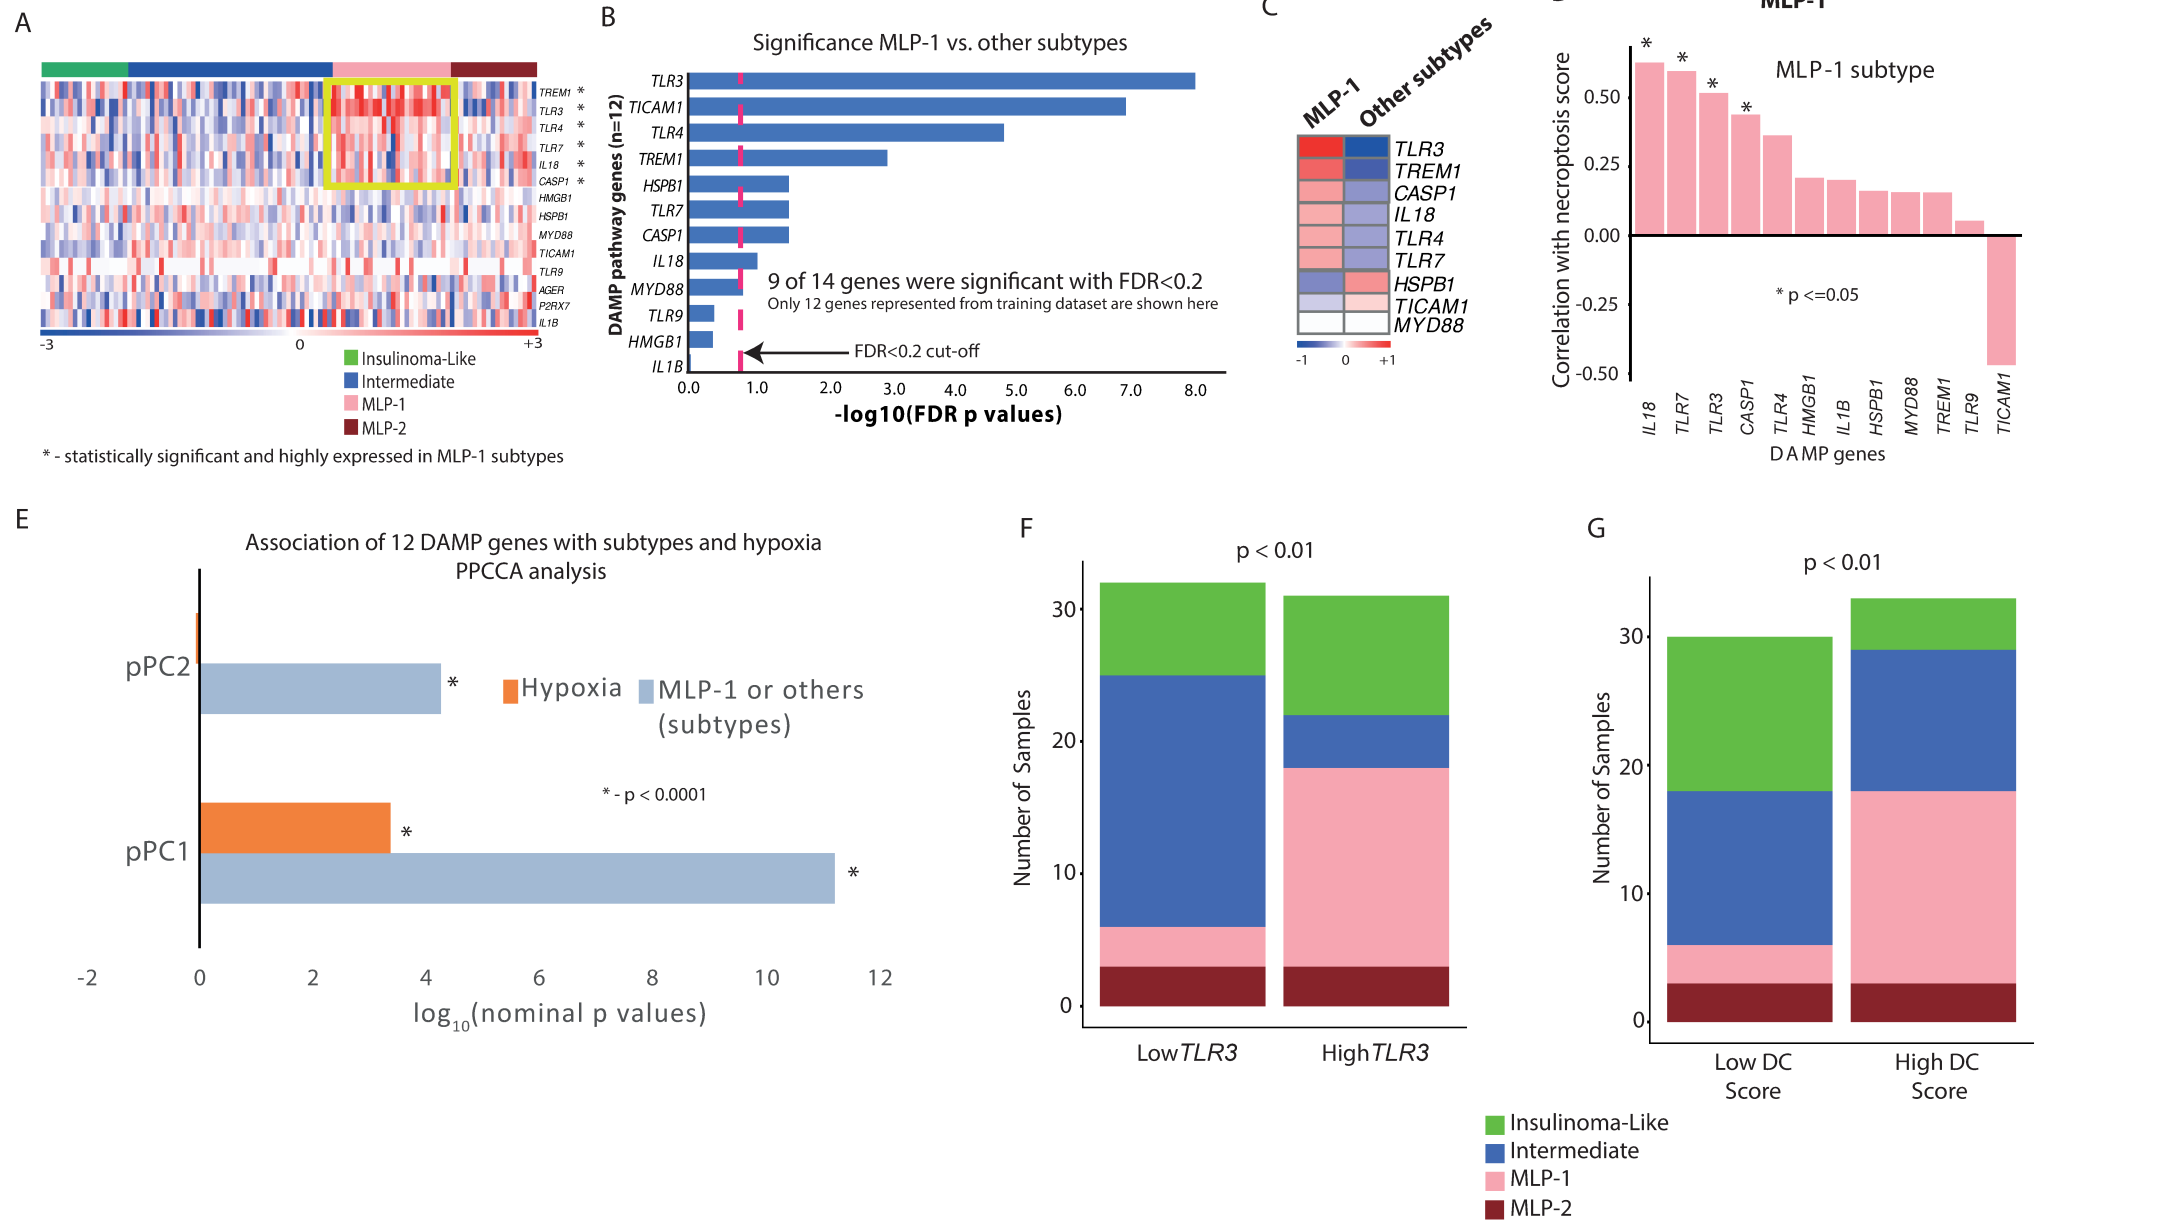

Supplement: gutjnl-2020-321016supp005.pdf [file gutjnl-2020-321016supp005.pdf]
